# Supplementary material for: Bacillus-Based Direct-Fed Microbial Reduces the Pathogenic Synergy of a Coinfection with Salmonella enterica Serovar Choleraesuis and Porcine Reproductive and Respiratory Syndrome Virus
Source: PubMed Central journal article supplement (PMC9022502; doi:10.1128/iai.00574-21), 2022-03-07
Supplement: iai.00574-21-s0001.pdf [file iai.00574-21-s0001.pdf]

1 Supplementary Table 1. Thermo Fisher TaqMan Assay ID of the porcine genes examined.  
2

| Thermo Fisher Assay ID | Gene Symbol    |
|------------------------|----------------|
| Ss03394068_m1          | JAK2           |
| Ss04248268_m1          | DHX58          |
| Ss03385661_u1          | SOCS2          |
| Ss03391255_m1          | C3             |
| Ss03388869_m1          | C6             |
| Ss03389383_g1          | CFB            |
| Ss03374608_u1          | NOS2           |
| Ss03388413_m1          | GRN            |
| Ss03820946_s1          | GZMB           |
| Ss03393804_m1          | IL-1B          |
| Ss03376563_uH          | ACTB           |
| Ss03381754_u1          | IL2RA          |
| Ss03379427_u1          | CASP8          |
| Ss03392428_m1          | IL-2           |
| Ss03391054_m1          | IFN- $\gamma$  |
| Ss03381278_u1          | TLR2           |
| Ss03394125_m1          | IL-4           |
| Ss03394862_g1          | IFN- $\alpha$  |
| Ss03388861_m1          | TLR3           |
| Ss03384604_u1          | IL-6           |
| Ss03378485_u1          | IFN- $\beta$   |
| Ss03389780_m1          | TLR4           |
| Ss03391176_m1          | IL-12          |
| Ss03392437_m1          | CXCL8          |
| Ss03393060_u1          | TLR9           |
| Ss03382372_u1          | IL-10          |
| Ss03378360_u1          | CXCL2          |
| Ss03375629_u1          | GAPDH          |
| Ss03391203_m1          | IL-18          |
| Ss03391855_m1          | CXCL12         |
| Ss03388575_m1          | NF $\kappa$ B1 |
| Ss03391318_g1          | TNF            |
| Ss03391676_m1          | CD4            |
| Ss03388426_m1          | STAT3          |
| Ss03395044_gH          | IL17F          |
| Ss03373919_m1          | IL22           |
| Ss04955543_m1          | TGFB1          |
| Ss03391669_m1          | CD8A           |
| Ss03391861_m1          | SIRPA          |

|               |        |
|---------------|--------|
| Ss03384432_u1 | CD19   |
| Ss03374588_m1 | ITGAM  |
| Ss03376695_u1 | FOXP3  |
| Ss04324123_m1 | MS4A1  |
| Ss03392220_m1 | TREM1  |
| Ss03393162_u1 | CD163  |
| Ss03819234_g1 | CD209  |
| Ss03394337_m1 | CD40   |
| Ss03213761_m1 | CTLA4  |
| Ss03389733_m1 | SELL   |
| Ss03818641_s1 | TLR10  |
| Ss03391764_m1 | NFKBIA |
| Ss03389452_m1 | LY96   |
| Ss03389985_m1 | NOD1   |
| Ss03386634_u1 | NOD2   |
| Ss04322983_m1 | DDX58  |
| Ss03387992_u1 | SOCS3  |

3  
4  
5  
6
